# Supplementary material for: Co-Electrospun Poly(ε-Caprolactone)/Zein Articular Cartilage Scaffolds
Source: MDPI journal article supplement (doi:10.3390/bioengineering10070771), 2023-06-27
Supplement: s1 [file s1]

## SUPPLEMENTARY MATERIALS

### Nanofiber surface of poly( $\epsilon$ -caprolactone)-zein-based one-nozzle electrospun articular cartilage scaffolds

Andre M. Souza Plath <sup>1,\*</sup>, Stephanie Huber <sup>1</sup>, Serena R. Alfarano <sup>2</sup>, Daniel F. Abbott <sup>3</sup>,  
Minghan Hu <sup>4</sup>, Victor Mougel <sup>3</sup>, Lucio Isa <sup>4</sup> and Stephen J. Ferguson <sup>1</sup>

\* Correspondence: [andre.souzaplath@hest.ethz.ch](mailto:andre.souzaplath@hest.ethz.ch)

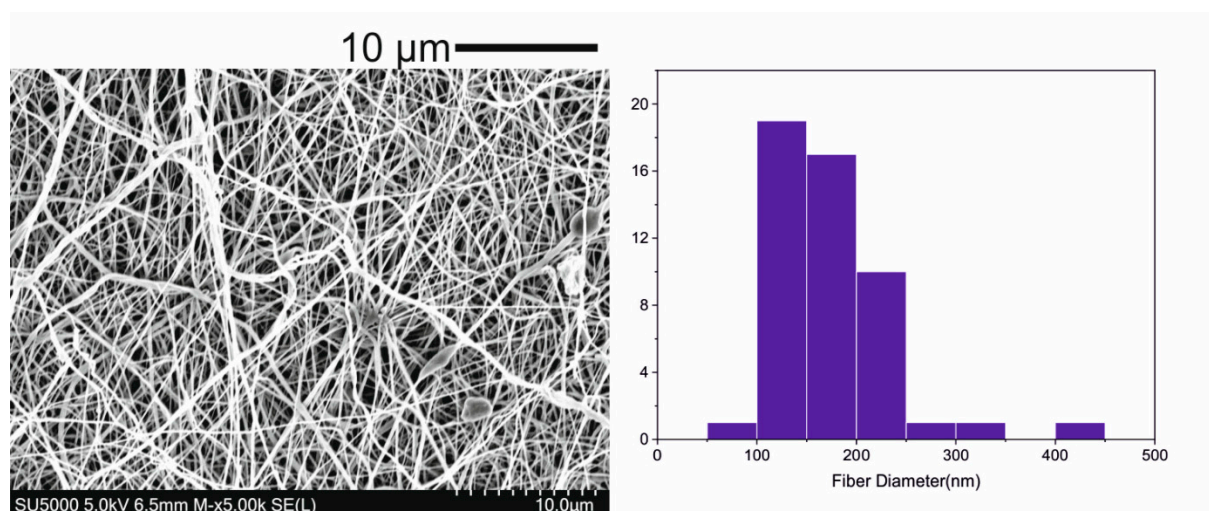

**Figure S 1:** SEM Images (5000 $\times$  Magnification) of the electrospun PCL samples in a FA/AA (70/30 vol./vol binary system)

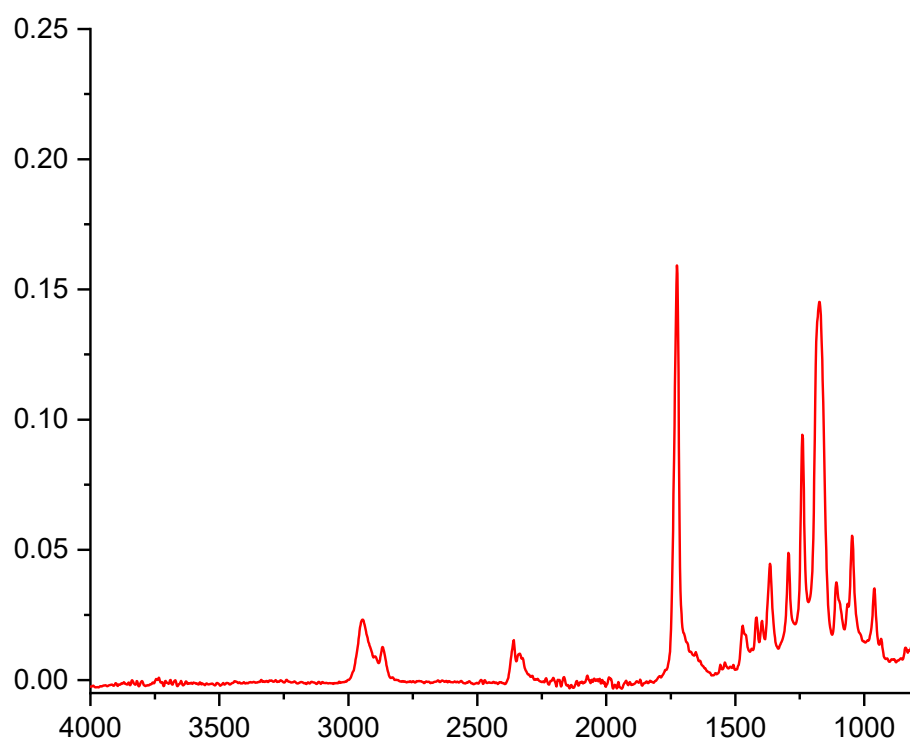

**Figure S2:** FTIR-ATR of sample 6P50Z incubated overnight in 70% Ethanol at room temperature (32 scans). - COOH and -NH<sub>2</sub> stretch, Amide II bands at 3500 cm<sup>-1</sup> and 1655 cm<sup>-1</sup> are absent.

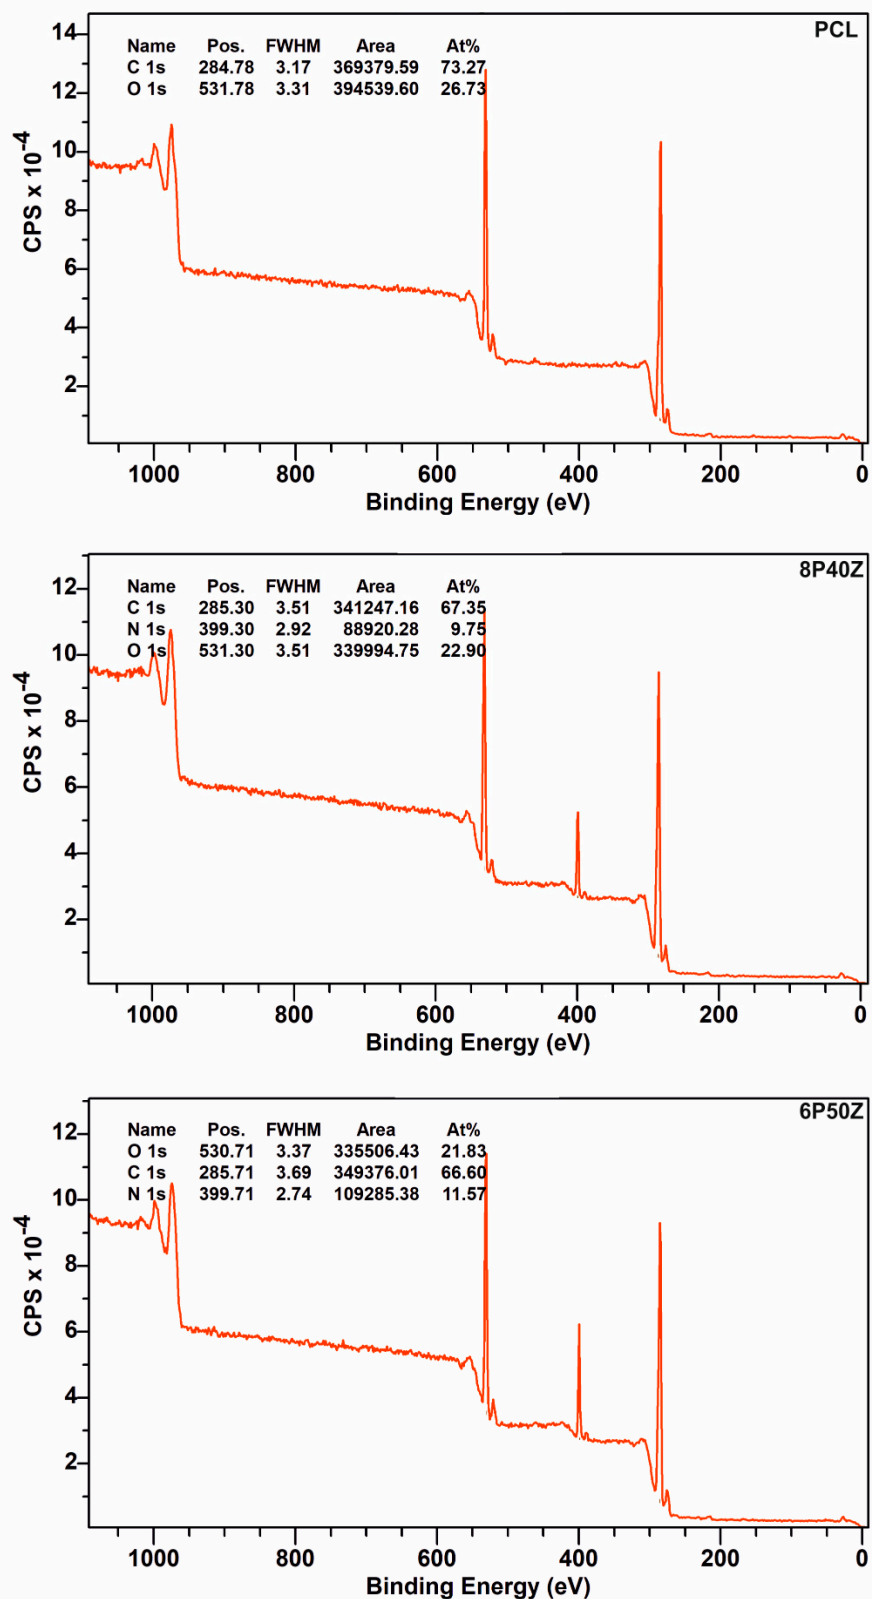

Figure S 3: XPS Survey of electrospun PCL, 8P40Z, and 6P50Z samples. Peak information in Table 3.

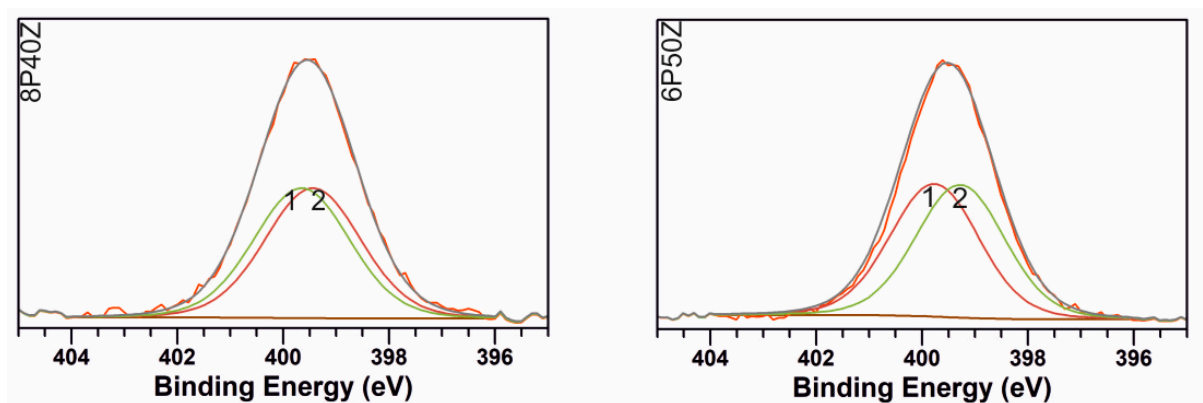

**Figure S 4:** N 1s high-resolution XPS spectra of 8P40Z and 6P50Z electrospun samples.

|                         | 8P40Z BE | 8P40Z Peak Area | 6P50Z BE | 6P50Z Peak Area |
|-------------------------|----------|-----------------|----------|-----------------|
| 1 ( $\text{C-NH}_3^+$ ) | 399.7    | 50.0            | 399.7    | 50.0            |
| 2 ( $\text{N-C=O}$ )    | 399.4    | 50.0            | 399.3    | 50.0            |

**Table S 1:** N 1s high-resolution spectra of electrospun samples 8P40Z and 6P50Z. BE: Binding Energy.

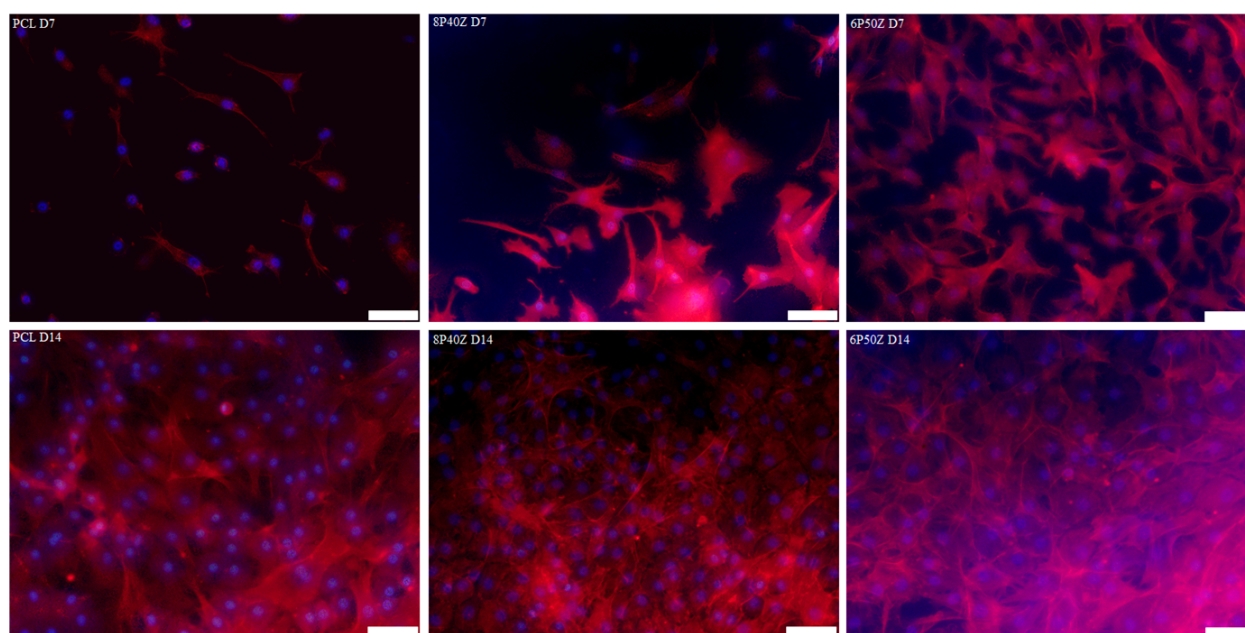

**Figure S 5:** Widefield Fluorescence Microscopy images obtained with the microscope Olympus IX51 at 20× magnification (scale bars 50  $\mu\text{m}$ )

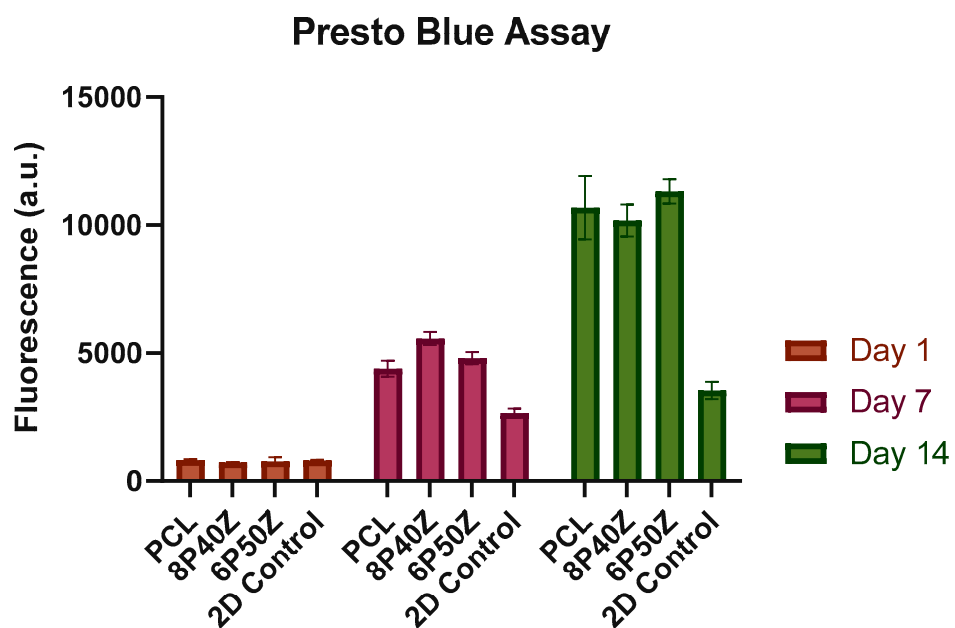

**Figure S6:** Presto Blue Assay, readings performed at 584nm (n = 12) using a M200 PRO Plate Reader (Tecan Switzerland).
